# Supplementary material for: Associations of infant milk feed type on early postnatal growth of offspring exposed and unexposed to gestational diabetes in utero
Source: Springer Nature journal article supplement (doi:10.1007/s00394-015-1057-0), 2015-09-28

**Online Resource 1:** Flowchart for GUSTO Study recruitment and eventual study sample

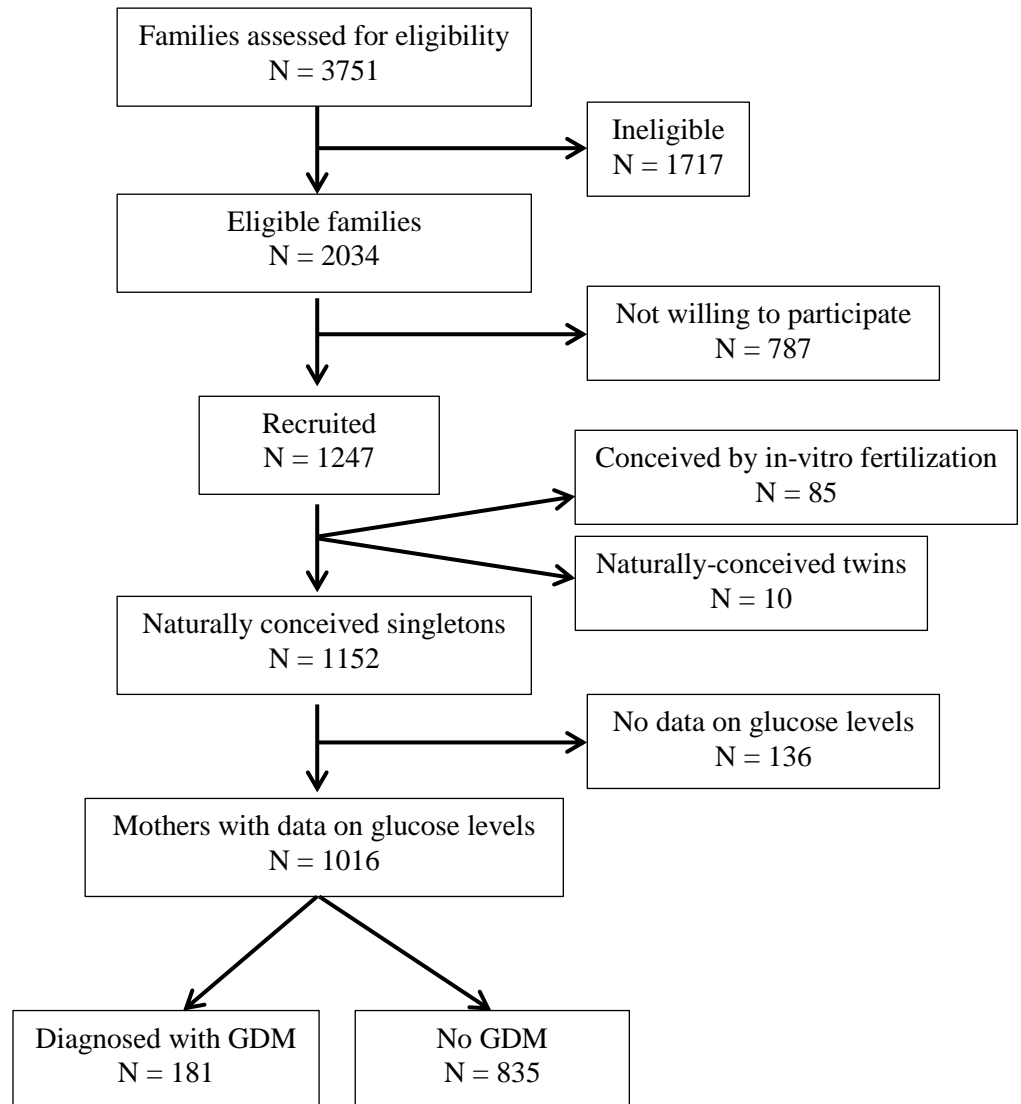

Supplement: MOESM1 [file 8392464]
